# Supplementary material for: Oxovanadium(v)-catalyzed amination of carbon dioxide under ambient pressure for the synthesis of ureas
Source: Royal Society of Chemistry journal article supplement (doi:10.1039/d1ra04125h), 2021-01-01
Supplement: d1ra04125h1.pdf [file d1ra04125h1.pdf]

## Supplementary Information

### **Oxovanadium(V)-Catalyzed Amination of Carbon Dioxide under Ambient Pressure for Synthesis of Ureas**

Toshiyuki Moriuchi,<sup>\*ab</sup> Takashi Sakuramoto,<sup>a</sup> Takanari Matsutani,<sup>c</sup> Ryota Kawai,<sup>a</sup>  
Yosuke Donaka,<sup>c</sup> Mamoru Tobisu<sup>a</sup> and Toshikazu Hirao<sup>ad</sup>

<sup>a</sup> *Department of Applied Chemistry, Graduate School of Engineering, Osaka University,  
Yamada-oka, Suita, Osaka 565-0871, Japan*

<sup>b</sup> *Present address: Division of Molecular Materials Science, Graduate School of Science,  
Osaka City University, 3-3-138 Sugimoto, Sumiyoshi-ku, Osaka 558-8585, Japan*

<sup>c</sup> *Division of Molecular Materials Science, Graduate School of Science, Osaka City  
University, 3-3-138 Sugimoto, Sumiyoshi-ku, Osaka 558-8585, Japan*

<sup>d</sup> *Present address: The Institute of Scientific and Industrial Research, Osaka University,  
Mihoga-oka, Ibaraki, Osaka 567-0047, Japan*

#### **Contents**

|                                                                             |           |
|-----------------------------------------------------------------------------|-----------|
| <b>1. General methods</b>                                                   | <b>2</b>  |
| <b>2. General procedure for oxovanadium(V)-catalyzed urea formation</b>     | <b>2</b>  |
| <b>3. Procedure for a gram-scale catalytic urea synthesis of 2a</b>         | <b>2</b>  |
| <b>4. Reaction of 1-adamantylamine with VO(O<sup>i</sup>Pr)<sub>3</sub></b> | <b>3</b>  |
| <b>5. Reaction of 3p with carbon dioxide</b>                                | <b>3</b>  |
| <b>6. Reaction of 3p with carbon dioxide in the presence of 1s</b>          | <b>3</b>  |
| <b>7. Reaction of 1a with carbon dioxide in the presence of 1t</b>          | <b>4</b>  |
| <b>8. Table S1</b>                                                          | <b>5</b>  |
| <b>9. Spectral data of products and chiral HPLC charts</b>                  | <b>6</b>  |
| <b>10. References</b>                                                       | <b>26</b> |

## 1. General Methods

All reagents and solvents were purchased from commercial sources and were further purified by the standard methods, if necessary. VO(TEA)<sup>1</sup> and the imidovanadium(V) compound **3p**<sup>2</sup> were prepared according to literature procedures. <sup>1</sup>H NMR and <sup>13</sup>C NMR spectra were recorded in CDCl<sub>3</sub> or DMSO-*d*<sub>6</sub> on a JEOL JNM-ECS 400 (400 MHz) spectrometer. Chemical shifts are given in  $\delta$  (ppm) relative to the residual solvent signal as an internal standard. High resolution mass spectra (HRMS) were measured on a JEOL JMS-700 spectrometer. Column chromatography was performed with SiO<sub>2</sub> (Wakogel C-200). The analysis of the chiral urea product **2i** was carried out using HPLC (Chiralpak IA, hexane/CHCl<sub>3</sub>/EtOH = 8:2:1, flow 0.5 mL/min, 254 nm).

## 2. General procedure for oxovanadium(V)-catalyzed urea formation

In a 10 mL two-necked flask, amine **1** (0.15 mmol), <sup>i</sup>Pr<sub>2</sub>EtN (3.9 mg, 0.030 mmol), VO(O<sup>i</sup>Pr)<sub>3</sub> (2.9 mg, 0.012 mmol), MS3A (2.0 g) and DMA (2.0 mL) were placed at a glove box filled with nitrogen. Next, nitrogen in the flask was replaced with CO<sub>2</sub>. The mixture was stirred at 130 °C for 15 h, followed by the filtration with celite®, treatment with water, and extraction with EtOAc. The organic layer was dried over Na<sub>2</sub>SO<sub>4</sub>, filtrated, and evaporated. Triphenylmethane or 1,3,5-trimethoxybenzene was added as an internal standard, and <sup>1</sup>H NMR analysis was performed to determine an NMR yield. Spectral data of the products were identical with those of authentic samples.

## 3. Procedure for a gram-scale catalytic urea synthesis of **2a**

In a 300 mL three-necked flask, 2-phenylethylamine (**1a**) (1.09 g, 9.0 mmol), 1,8-bis(dimethylamino)naphthalene (0.386 g, 1.8 mmol), VO(O<sup>i</sup>Pr)<sub>3</sub> (0.176 g, 0.72 mmol), MS3A (40 g) and DMA (120 mL) were placed at a glove box filled with nitrogen. Next, nitrogen in the flask was replaced with CO<sub>2</sub>. The mixture was stirred at 130 °C for 24 h, followed by the filtration with celite®, treatment with water, and extraction with EtOAc. The organic layer was dried over Na<sub>2</sub>SO<sub>4</sub>, filtrated, and evaporated. The residue was chromatographed on a silica gel column eluting with hexane and ethyl acetate (1/3, v/v) to give 0.88 g (73% yield) of *N,N'*-bis(2-phenylethyl)urea (**2a**).

#### 4. Reaction of 1-adamantylamine with VO(O<sup>i</sup>Pr)<sub>3</sub>

In a 20 mL two-necked flask, 1-adamantylamine (**1p**) (90.8 mg, 0.60 mmol), <sup>i</sup>Pr<sub>2</sub>EtN (77.5 mg, 0.60 mmol), VO(O<sup>i</sup>Pr)<sub>3</sub> (146.8 mg, 0.60 mmol), 1,3,5-trimethoxybenzene (50.5 mg, 0.30 mmol) as an internal standard, MS3A (2.0 g) and DMA (2.0 mL) were placed at a glove box filled with nitrogen. The mixture was stirred at 130 °C for 2 h. After the reaction, <sup>1</sup>H NMR analysis was performed to determine an NMR yield. The imidovanadium(V) compound **3p** was found to be formed in 22% NMR yield.

#### 5. Reaction of **3p** with carbon dioxide

In a 10 mL two-necked flask, the imidovanadium(V) compound **3p** (56.6 mg, 0.15 mmol) and DMA (2.0 mL) were placed at a glove box filled with nitrogen. Next, nitrogen in the flask was replaced with CO<sub>2</sub>. The mixture was stirred at 130 °C for 24 h, followed by treatment with 1 M HCl solution and extraction with dichloromethane. The organic layer was dried over Na<sub>2</sub>SO<sub>4</sub>, filtrated, and evaporated. The residue was subjected to preparative TLC (ethyl acetate/dichloromethane = 1:40) to afford 17.6 mg (71% yield) of *N,N'*-bis(tricyclo[3.3.1.1<sup>3,7</sup>]dec-1-yl)urea (**2p**).

#### 6. Reaction of **3p** with carbon dioxide in the presence of **1s**

In a 10 mL two-necked flask, the imidovanadium(V) compound **3p** (56.6 mg, 0.15 mmol), 1-phenylpiperazine (**1s**) (48.2 mg, 0.30 mmol) and DMA (2.0 mL) were placed at a glove box filled with nitrogen. Next, nitrogen in the flask was replaced with CO<sub>2</sub>. The mixture was stirred at 130 °C for 24 h, followed by treatment with 1 M HCl solution and extraction with dichloromethane. The organic layer was dried over Na<sub>2</sub>SO<sub>4</sub>, filtrated, and evaporated. The residue was subjected to preparative TLC (ethyl acetate/dichloromethane = 1:1) to give 3.5 mg (14% yield) of *N,N'*-bis(tricyclo[3.3.1.1<sup>3,7</sup>]dec-1-yl)urea (**2p**) and 20.8 mg (41% yield) of 4-phenyl-*N*-tricyclo[3.3.1.1<sup>3,7</sup>]dec-1-yl-1-piperazinecarboxamide (**2ps**).

## 7. Reaction of **1a** with carbon dioxide in the presence of **1t**

In a 10 mL two-necked flask, 2-phenylethylamine (**1a**) (9.1 mg, 0.075 mmol), 4-phenylpiperidine (**1t**) (12.1 mg, 0.075 mmol),  $^i\text{Pr}_2\text{EtN}$  (3.9 mg, 0.030 mmol),  $\text{VO}(\text{O}^i\text{Pr})_3$  (2.9 mg, 0.012 mmol), MS3A (2.0 g) and DMA (2.0 mL) were placed at a glove box filled with nitrogen. Next, nitrogen in the flask was replaced with  $\text{CO}_2$ . The mixture was stirred at 130 °C for 15 h, followed by the filtration with celite®, treatment with water, and extraction with EtOAc. The organic layer was dried over  $\text{Na}_2\text{SO}_4$ , filtrated, and evaporated. 1,3,5-Trimethoxybenzene was added as an internal standard, and  $^1\text{H}$  NMR analysis was performed to determine an NMR yield (*N,N'*-bis(2-phenylethyl)urea (**2a**) and 4-phenyl-*N*-(2-phenylethyl)-1-piperidinecarboxamide (**2at**) in 51% and 27% yields, respectively).

## 8. Table S1

**Table S1** Oxovanadium(V)-catalyzed urea formation from 2-phenylethylamine and carbon dioxide.<sup>a</sup>

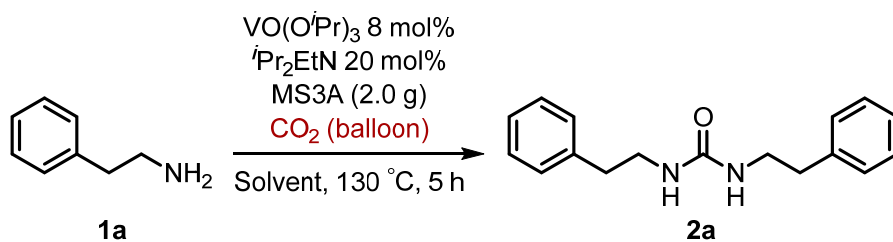

| Entry | Solvent    | NMR yield (%) <sup>b</sup> |
|-------|------------|----------------------------|
| 1     | DMA        | 81                         |
| 2     | DMF        | 64                         |
| 3     | NMP        | 56                         |
| 4     | DMSO       | 40                         |
| 5     | mesitylene | 17                         |
| 6     | octane     | 13                         |

<sup>a</sup> Reaction conditions: **1a** (0.15 mmol), catalyst (8 mol%),  $i\text{Pr}_2\text{EtN}$  (20 mol%) and MS3A (2.0 g) in DMA (2.0 mL) under carbon dioxide (balloon) at 130 °C for 5 h. <sup>b</sup> NMR yield (%) = [product (mmol) x 2 / substrate (mmol)] x 100.

## 9. Spectral data of products and chiral HPLC charts

*N,N'*-Bis(2-phenylethyl)urea (**2a**) [CAS Registry No. 5467-84-5]:  $^1\text{H}$  NMR (400 MHz,  $\text{CDCl}_3$ )  $\delta$  7.32-7.16 (m, 10H), 4.12 (br, 2H), 3.43-3.38 (m, 4H), 2.79 (t,  $J = 6.8$  Hz, 4H);  $^{13}\text{C}$  NMR (100 MHz,  $\text{CDCl}_3$ ) 157.9, 139.3, 129.0, 128.8, 126.6, 41.8, 36.5 ppm; HRMS (FAB)  $m/z$  Calcd. for  $\text{C}_{17}\text{H}_{21}\text{N}_2\text{O}$  ( $[\text{M} + \text{H}]^+$ ), 269.1648; Found, 269.1652.

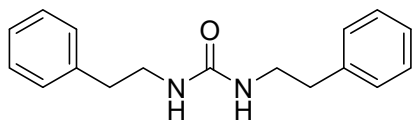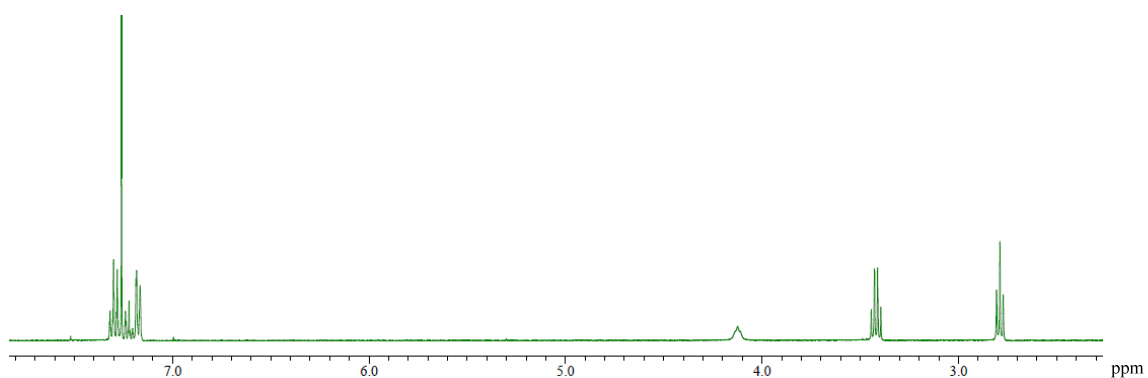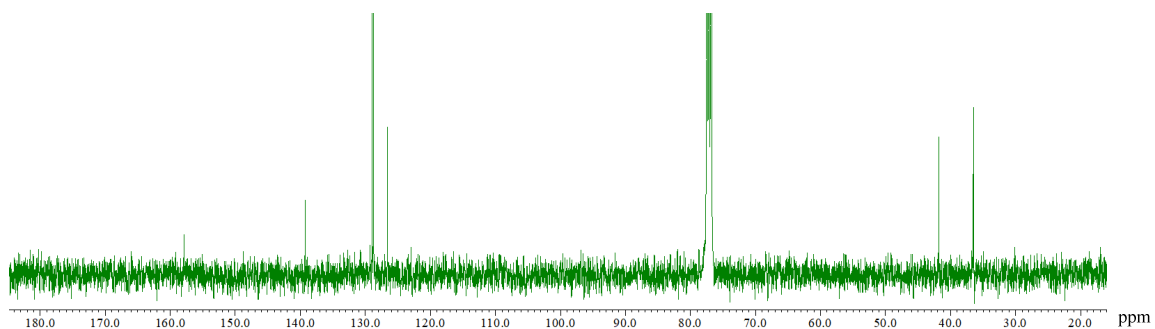

*N,N'*-Bis[2-(4-bromophenyl)ethyl]urea (**2b**) [CAS Registry No. 1355204-95-3]:  $^1\text{H}$  NMR (400 MHz,  $\text{CDCl}_3$ )  $\delta$  7.42 (d,  $J = 8.2$  Hz, 4H), 7.05 (d,  $J = 8.2$  Hz, 4H), 4.11 (br, 2H), 3.42-3.37 (m, 4H), 2.75 (t,  $J = 6.8$  Hz, 4H);  $^{13}\text{C}$  NMR (100 MHz,  $\text{CDCl}_3$ ) 157.5, 138.1, 131.7, 130.5, 120.3, 41.4, 35.8 ppm; HRMS (FAB)  $m/z$  Calcd. for  $\text{C}_{17}\text{H}_{19}\text{Br}_2\text{N}_2\text{O}$  ( $[\text{M} + \text{H}]^+$ ), 424.9859; Found, 424.9856.

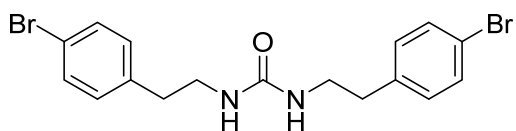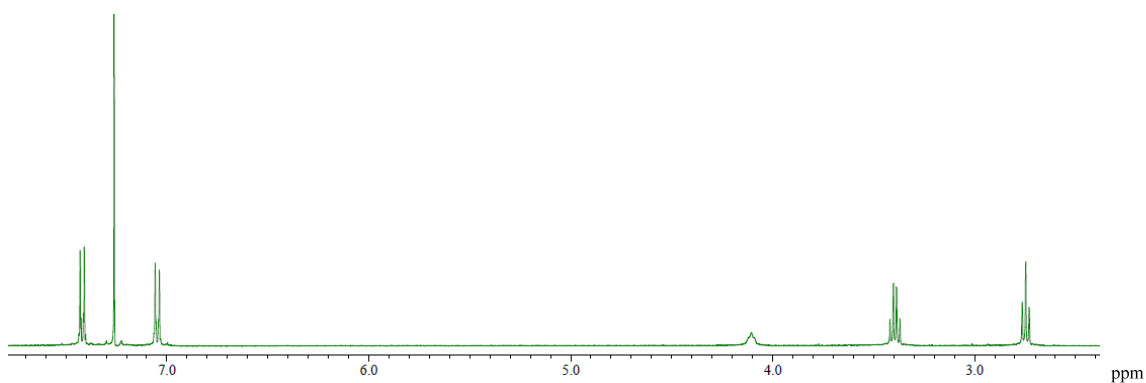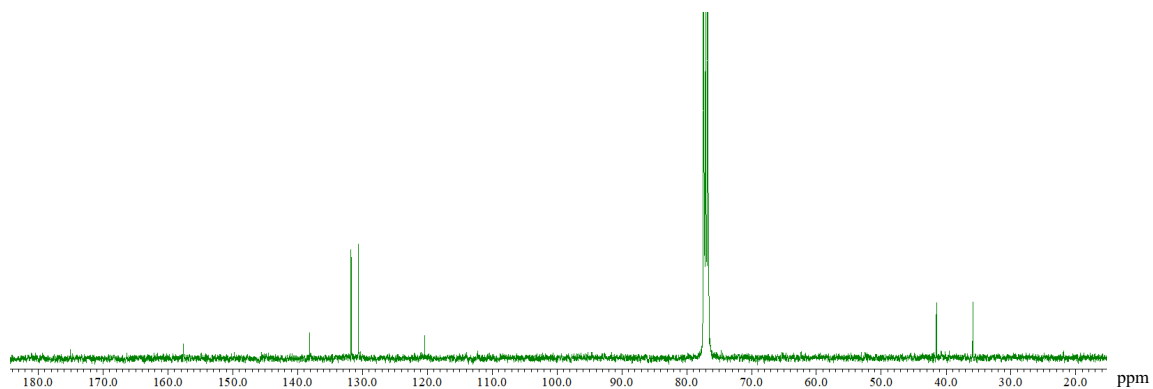

*N,N'*-Bis[2-(4-methylphenyl)ethyl]urea (**2c**) [CAS Registry No. 1900254-27-4]:  $^1\text{H}$  NMR (400 MHz,  $\text{CDCl}_3$ )  $\delta$  7.10-7.703 (m, 8H), 4.21 (br, 2H), 3.38-3.34 (m, 4H), 2.72 (t,  $J = 6.9$  Hz, 4H), 2.31 (s, 6H);  $^{13}\text{C}$  NMR (100 MHz,  $\text{CDCl}_3$ ) 158.2, 136.2, 135.8, 129.4, 128.8, 42.0, 35.8, 21.1 ppm; HRMS (ESI)  $m/z$  Calcd for  $\text{C}_{19}\text{H}_{24}\text{N}_2\text{ONa}$  ( $[\text{M} + \text{Na}]^+$ ), 319.1786; Found, 319.1806.

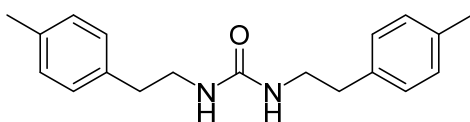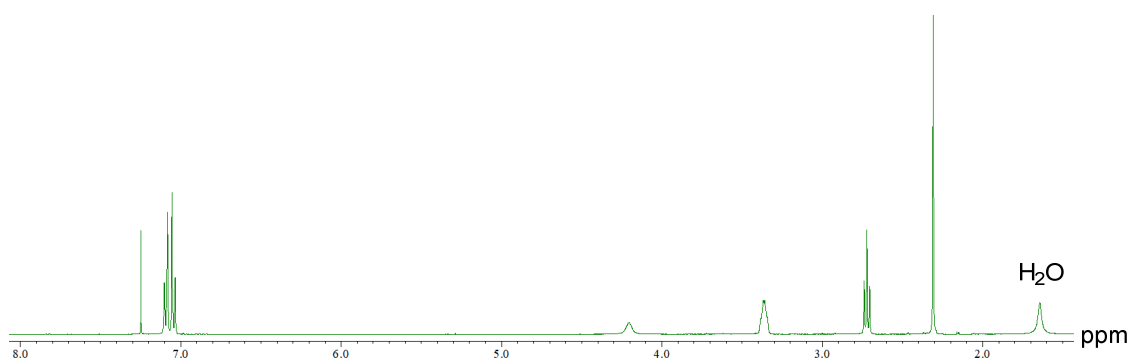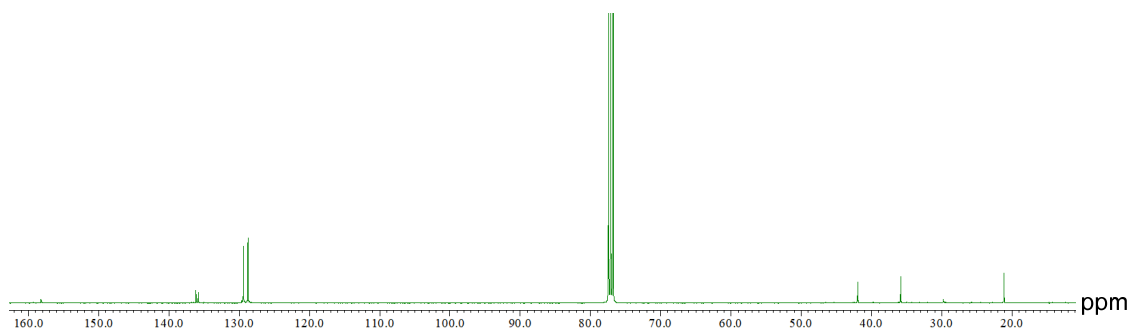



*N,N'*-Bis(2-Phenylpropyl)urea (**2d**) [CAS Registry No. 1007781-77-2]:  $^1\text{H}$  NMR (400 MHz,  $\text{CDCl}_3$ )  $\delta$  7.31-7.13 (m, 10H), 3.99 (br, 2H), 3.48-3.42 (m, 2H), 3.13-3.05 (m, 2H), 2.92-2.81 (m, 2H), 1.22 (d,  $J = 6.9$  Hz, 6H);  $^{13}\text{C}$  NMR (100 MHz,  $\text{CDCl}_3$ ) 158.1, 144.2, 128.8, 127.3, 126.8, 47.4, 40.2, 19.3 ppm; HRMS (ESI)  $m/z$  Calcd for  $\text{C}_{19}\text{H}_{24}\text{N}_2\text{O}_1\text{Na}$  ( $[\text{M} + \text{Na}]^+$ ), 319.1786; Found, 319.1797.

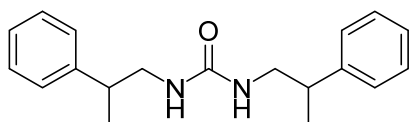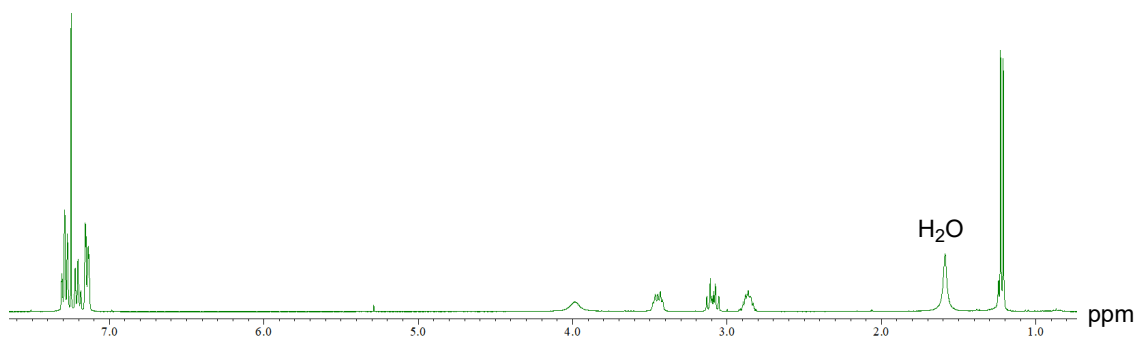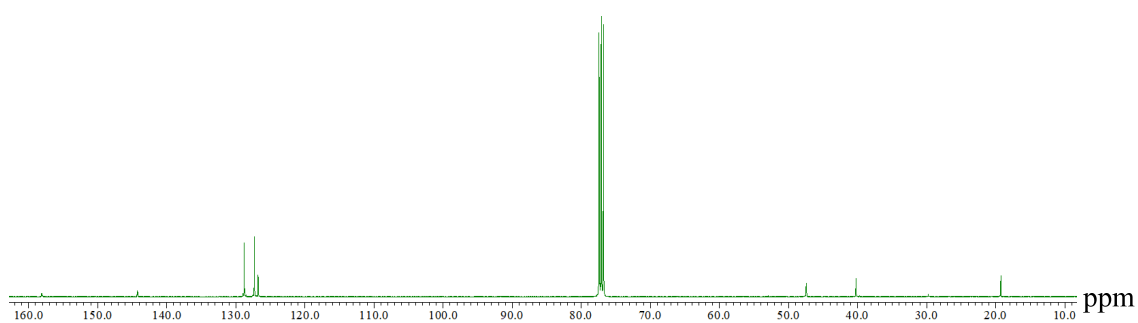

*N,N'*-Bis(3-phenylpropyl)urea (**2e**) [CAS Registry No. 1809527-04-5]:  $^1\text{H}$  NMR (400 MHz,  $\text{CDCl}_3$ )  $\delta$  7.28-7.15 (m, 10H), 4.23 (br, 2H), 3.18-3.12 (m, 4H), 2.63 (t,  $J = 7.6$  Hz, 4H), 1.80 (quint,  $J = 7.6$  Hz, 4H);  $^{13}\text{C}$  NMR (100 MHz,  $\text{CDCl}_3$ ) 158.4, 141.6, 128.6, 128.5, 126.1, 40.3, 33.3, 31.8 ppm; HRMS (ESI)  $m/z$  Calcd for  $\text{C}_{19}\text{H}_{24}\text{N}_2\text{ONa}$  ( $[\text{M} + \text{Na}]^+$ ), 319.1786; Found, 319.1801.

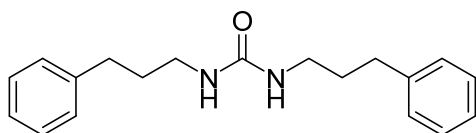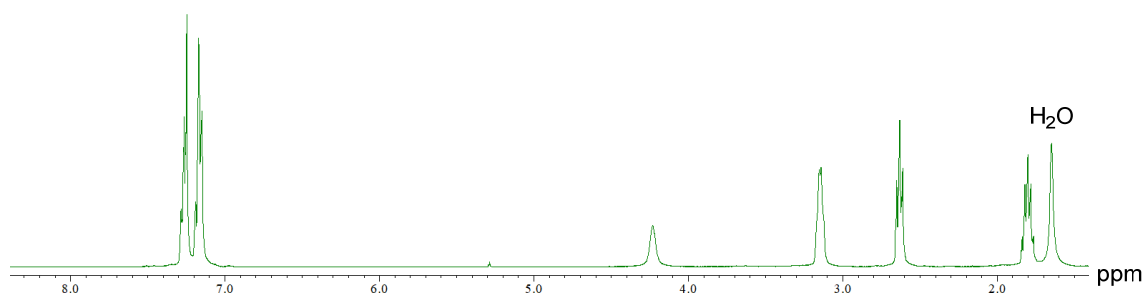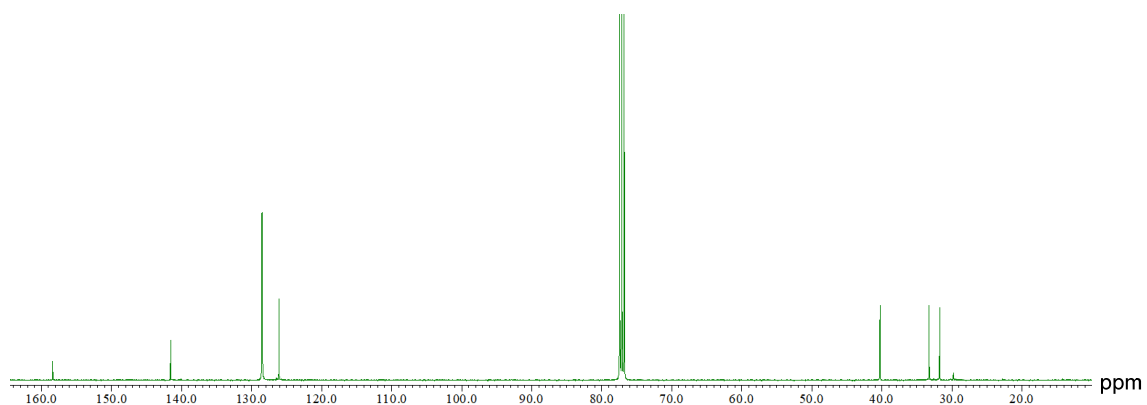

*N,N'*-Bis(3,3-diphenylpropyl)urea (**2f**) [CAS Registry No. 100938-83-8]:  $^1\text{H}$  NMR (400 MHz,  $\text{CDCl}_3$ )  $\delta$  7.34-7.22 (m, 10H), 5.32 (br, 2H), 3.94 (t,  $J = 7.8$  Hz, 2H), 3.25-3.20 (m, 4H), 2.27 (q,  $J = 7.4$  Hz, 4H);  $^{13}\text{C}$  NMR (100 MHz,  $\text{CDCl}_3$ ) 170.5, 144.3, 128.8, 127.9, 126.6, 49.4, 38.9, 35.2 ppm; HRMS (ESI)  $m/z$  Calcd for  $\text{C}_{31}\text{H}_{32}\text{N}_2\text{ONa}$  ( $[\text{M} + \text{Na}]^+$ ), 471.2412; Found, 471.2406.

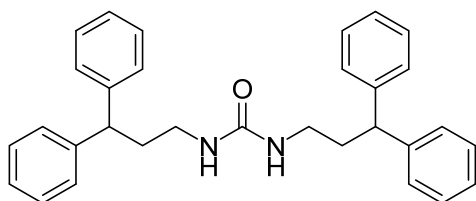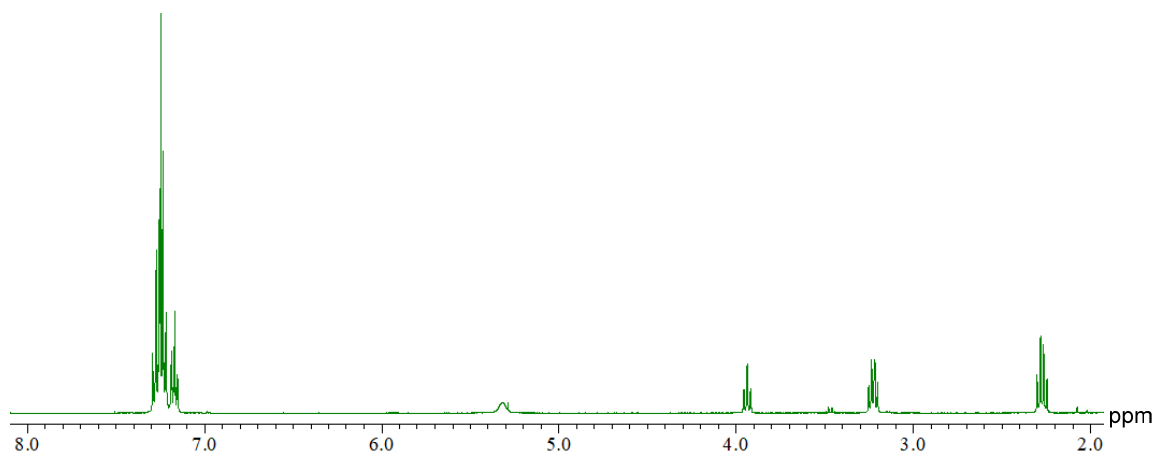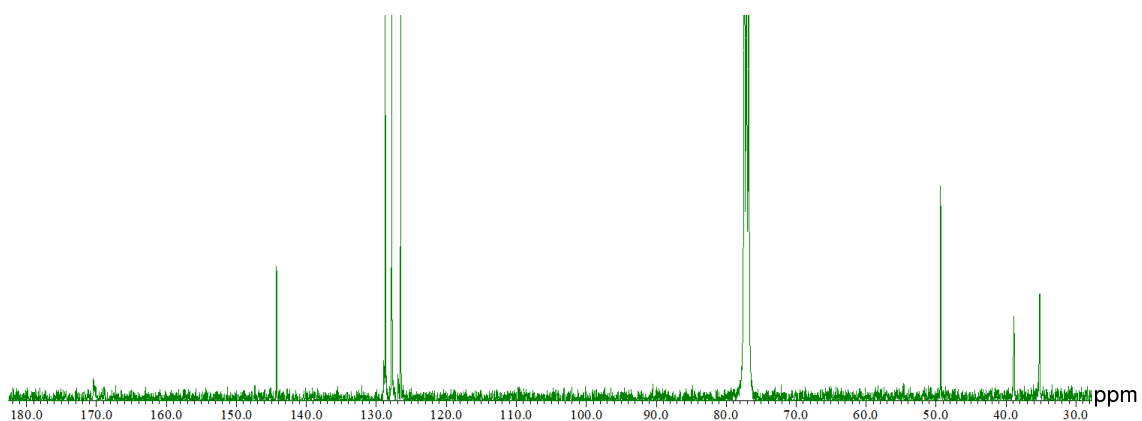

*N,N'*-Bis(phenylmethyl)urea (**2g**) [CAS Registry No. 1466-67-7]:  $^1\text{H}$  NMR (400 MHz,  $\text{CDCl}_3$ )  $\delta$  7.34-7.22 (m, 10H), 4.75 (br, 2H), 4.35 (d,  $J = 6.0$  Hz, 4H);  $^{13}\text{C}$  NMR (100 MHz,  $\text{CDCl}_3$ ) 158.1, 139.2, 128.8, 127.6, 127.5, 44.8 ppm; HRMS (EI)  $m/z$  Calcd for  $\text{C}_{15}\text{H}_{16}\text{N}_2\text{O}$  ( $[\text{M}]^+$ ), 240.1263; Found, 240.1264.

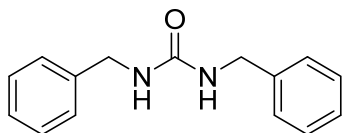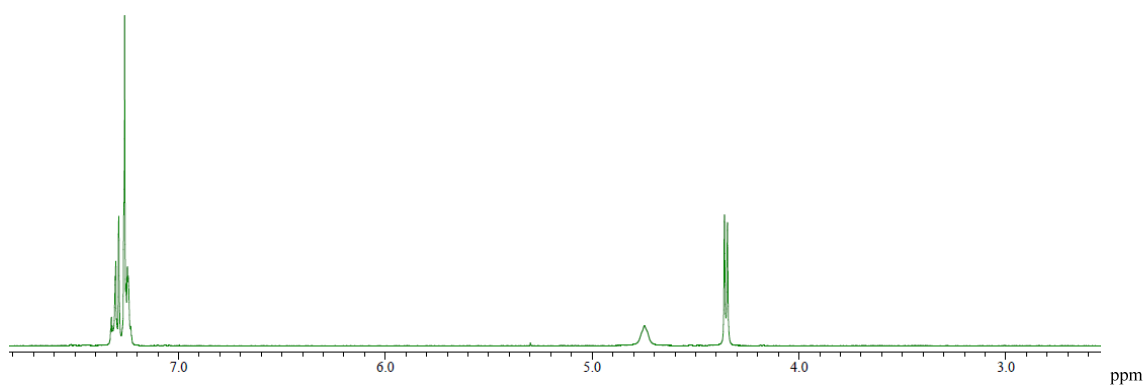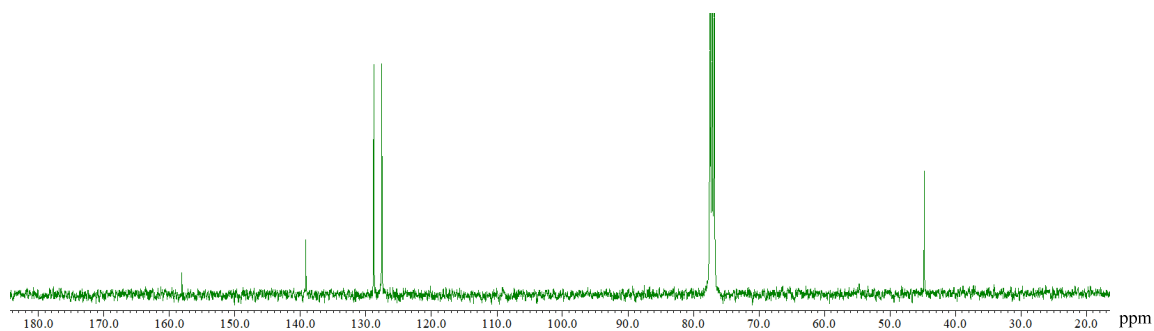

*N,N'*-Bis[(4-trifluoromethylphenyl)methyl]urea (**2h**) [CAS Registry No. 853180-18-4]:  $^1\text{H}$  NMR (400 MHz,  $\text{DMSO-}d_6$ )  $\delta$  7.64 (d,  $J = 8.0$  Hz, 4H), 7.42 (d,  $J = 8.0$  Hz, 4H), 6.71 (t,  $J = 6.0$  Hz, 2H), 4.27 (d,  $J = 6.0$  Hz, 4H);  $^{13}\text{C}$  NMR (100 MHz,  $\text{DMSO-}d_6$ ) 158.6, 146.6, 128.1, 127.7 (q,  $^2J_{\text{F-C}} = 31.6$  Hz), 125.6 (q,  $^3J_{\text{F-C}} = 3.5$  Hz), 124.9 (q,  $^1J_{\text{F-C}} = 272.2$  Hz), 43.1;  $^{19}\text{F}$  NMR (377 Hz,  $\text{DMSO-}d_6$ ) -61.6 ppm; HRMS (ESI)  $m/z$  Calcd for  $\text{C}_{17}\text{H}_{14}\text{F}_6\text{N}_2\text{ONa}$  ( $[\text{M} + \text{Na}]^+$ ), 399.0908; Found, 399.0914.

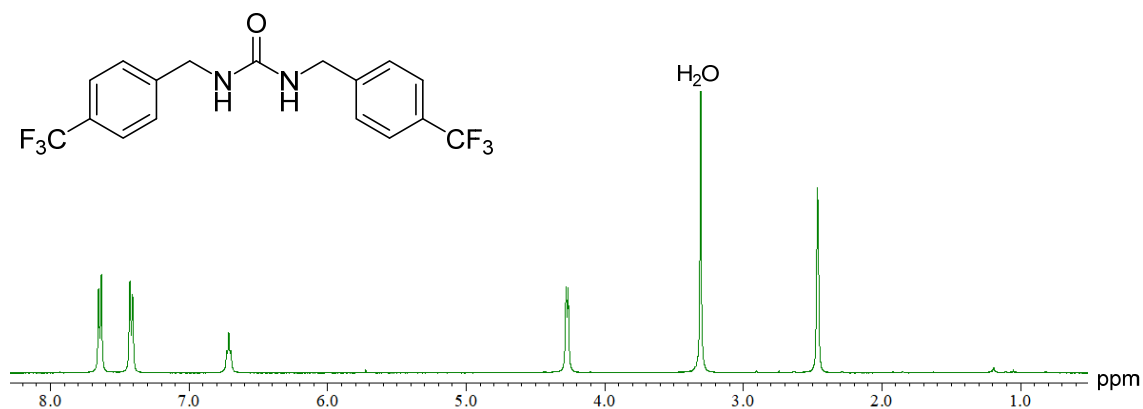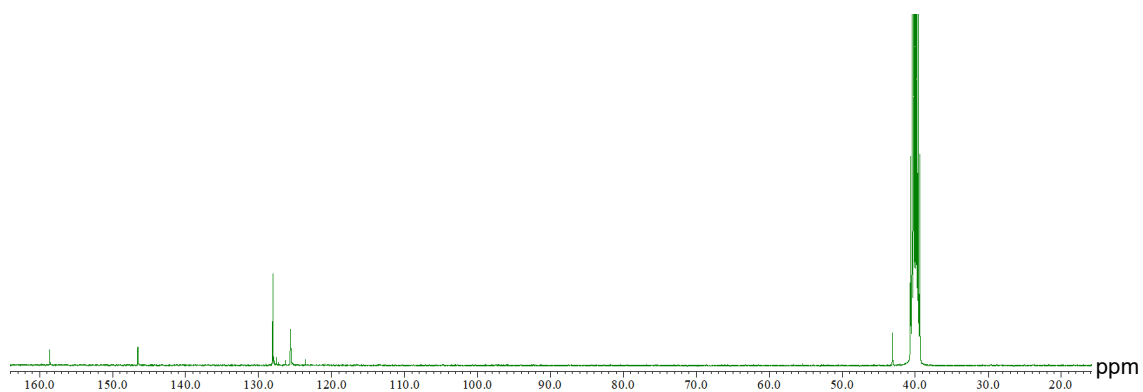

$^{19}\text{F}$  NMR

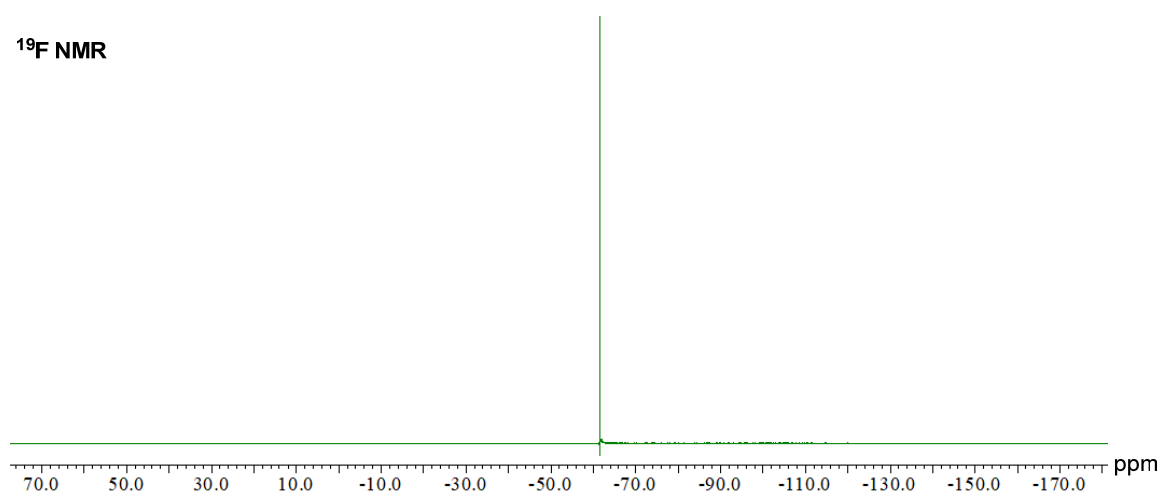

*N,N'*-Bis[(1*S*)-1-phenylethyl]urea (**2i**) [CAS Registry No. 19035-04-2]:  $^1\text{H}$  NMR (400 MHz,  $\text{DMSO-}d_6$ )  $\delta$  7.33-7.19 (m, 10H), 6.26 (d,  $J = 8.4$  Hz, 2H), 4.74-4.67 (m, 2H), 1.28 (d,  $J = 7.2$  Hz, 6H);  $^{13}\text{C}$  NMR (100 MHz,  $\text{DMSO-}d_6$ ) 156.5, 145.8, 128.2, 126.5, 125.8, 48.6, 23.4 ppm; HRMS (ESI)  $m/z$  Calcd for  $\text{C}_{17}\text{H}_{20}\text{N}_2\text{NaO}_1$  ( $[\text{M} + \text{Na}]^+$ ), 291.14733; Found, 291.14677.

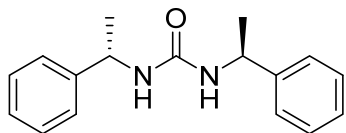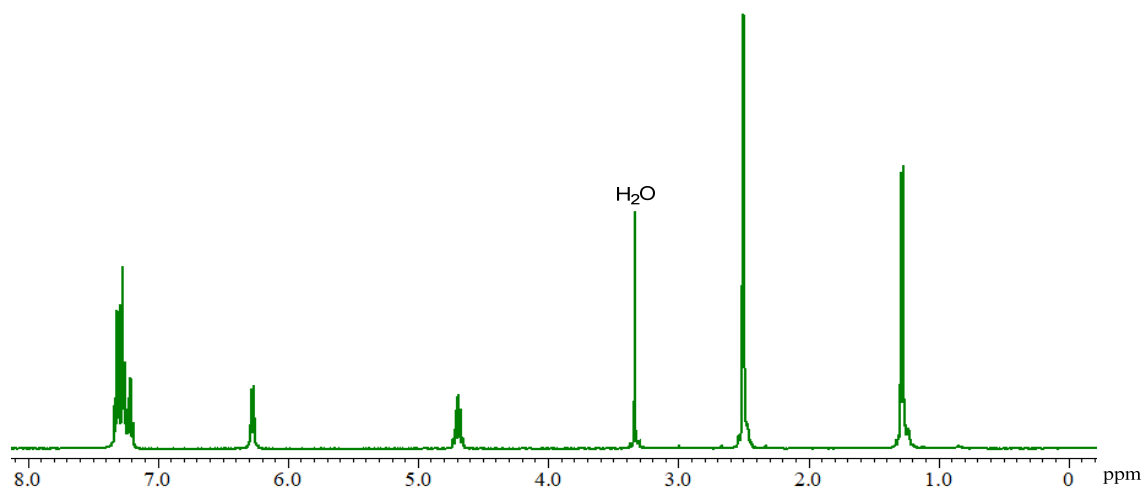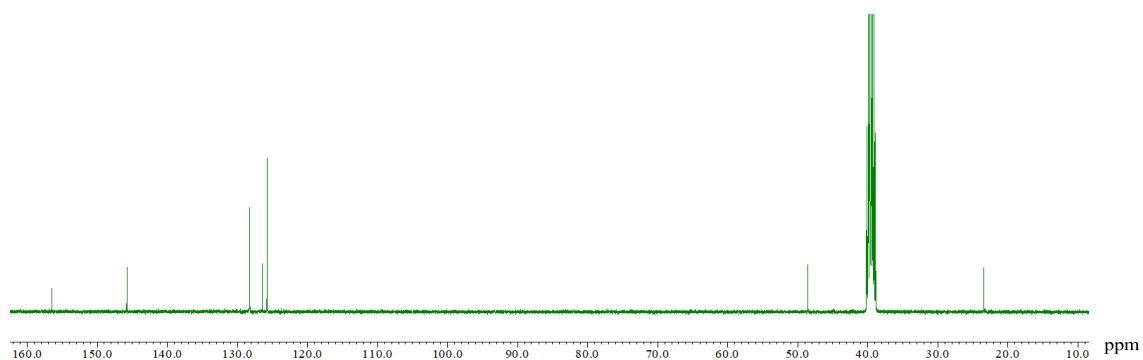

*N,N'*-Dihexylurea (**2j**) [CAS Registry No. 2763-88-4]:  $^1\text{H}$  NMR (400 MHz,  $\text{CDCl}_3$ )  $\delta$  4.30 (br, 2H), 3.18-3.14 (m, 4H), 1.54-1.47 (m, 4H), 1.34-1.25 (m, 12H), 0.89 (t,  $J = 6.8$  Hz, 6H);  $^{13}\text{C}$  NMR (100 MHz,  $\text{CDCl}_3$ ) 158.3, 41.0, 31.7, 30.3, 26.7, 22.7, 14.2 ppm; HRMS (EI)  $m/z$  Calcd. for  $\text{C}_{13}\text{H}_{28}\text{N}_2\text{O}$  ( $[\text{M}]^+$ ), 228.2202; Found, 228.2204.

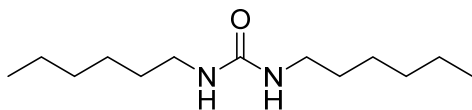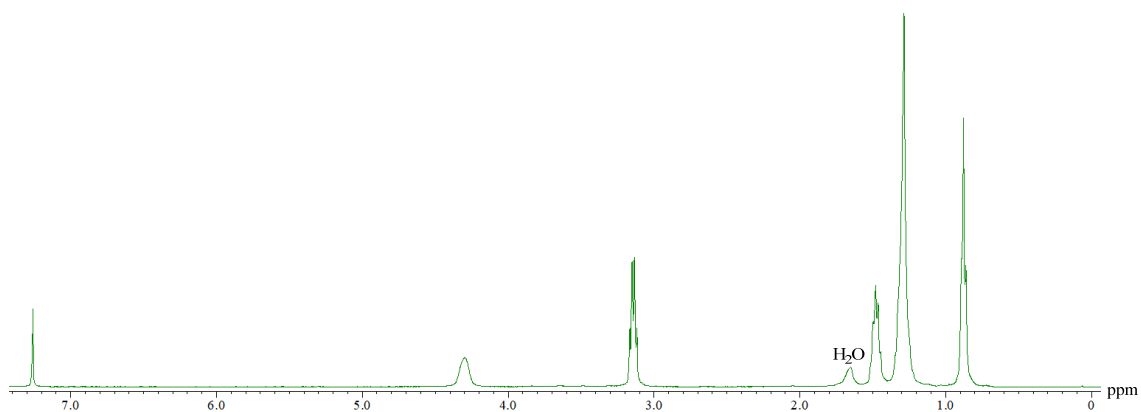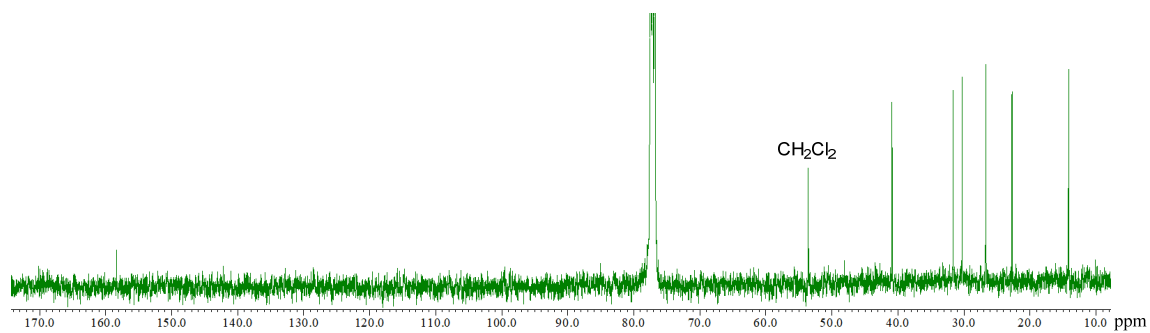

*N,N'*-Didecylurea (**2k**) [CAS Registry No. 1943-09-5]:  $^1\text{H}$  NMR (400 MHz,  $\text{CD}_3\text{OD}$ )  $\delta$  3.06 (t,  $J = 6.9$  Hz, 4H), 1.45-1.42 (m, 4H), 1.29-1.27 (m, 28H), 0.87 (t,  $J = 6.9$  Hz, 4H);  $^{13}\text{C}$  NMR (100 MHz,  $\text{CDCl}_3$ ) 158.3, 40.8, 32.0, 29.7, 29.44, 29.41, 27.0, 22.8, 14.2 ppm; HRMS (ESI)  $m/z$  Calcd for  $\text{C}_{21}\text{H}_{44}\text{N}_2\text{ONa}$  ( $[\text{M} + \text{Na}]^+$ ), 363.3351; Found, 363.3356.

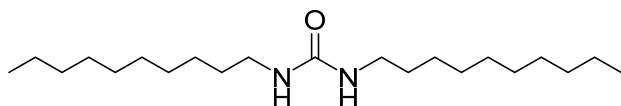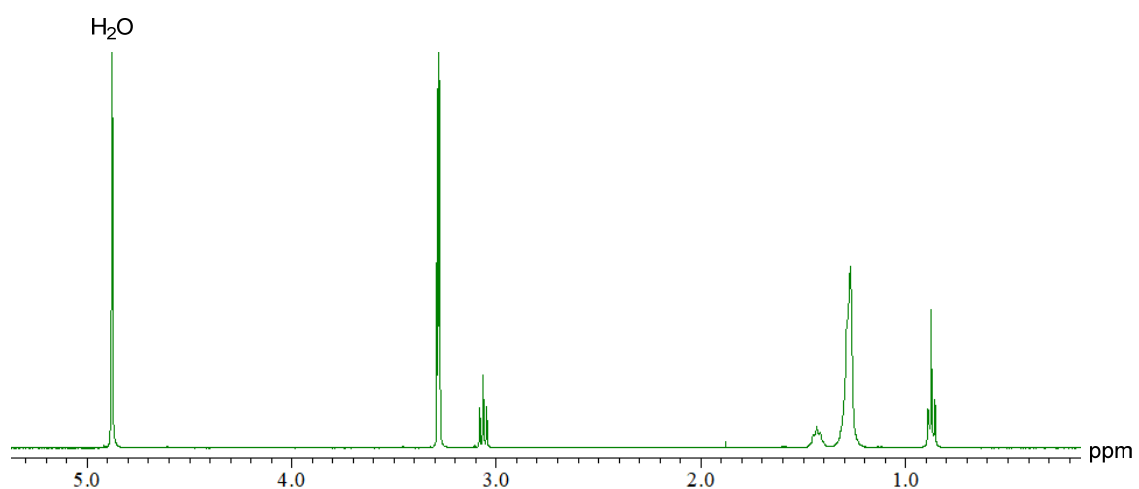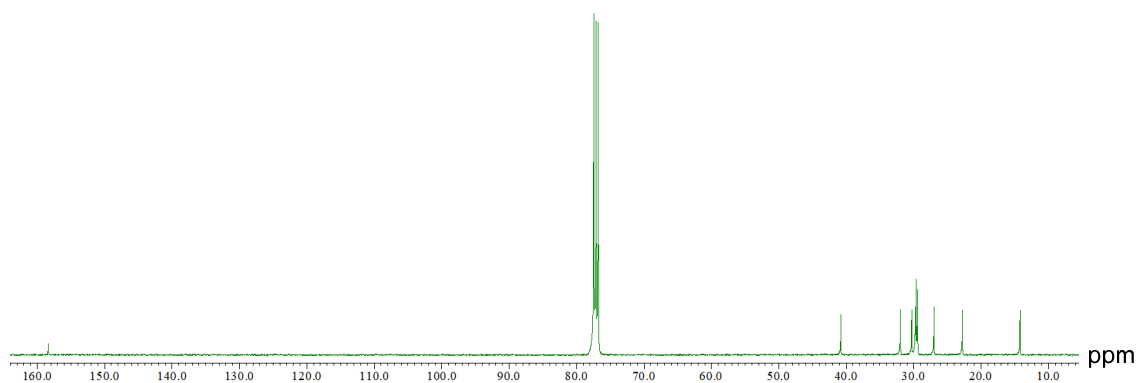



*N,N'*-Bis(3-ethoxypropyl)urea (**21**) [CAS Registry No. 2205524-12-3]:  $^1\text{H}$  NMR (400 MHz,  $\text{CDCl}_3$ )  $\delta$  5.23 (br, 2H), 3.51-3.44 (m, 8H), 3.27 (t,  $J = 6.3$  Hz, 4H), 1.80-1.1.74 (m, 4H), 1.19 (t,  $J = 7.0$  Hz, 6H);  $^{13}\text{C}$  NMR (100 MHz,  $\text{CDCl}_3$ ) 158.8, 69.0, 66.5, 39.1, 29.8, 15.3 ppm; HRMS (ESI)  $m/z$  Calcd for  $\text{C}_{11}\text{H}_{24}\text{N}_2\text{O}_3\text{Na}$  ( $[\text{M} + \text{Na}]^+$ ), 255.1685; Found, 255.1683.

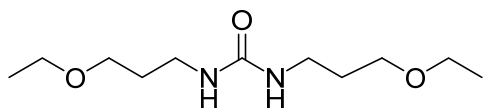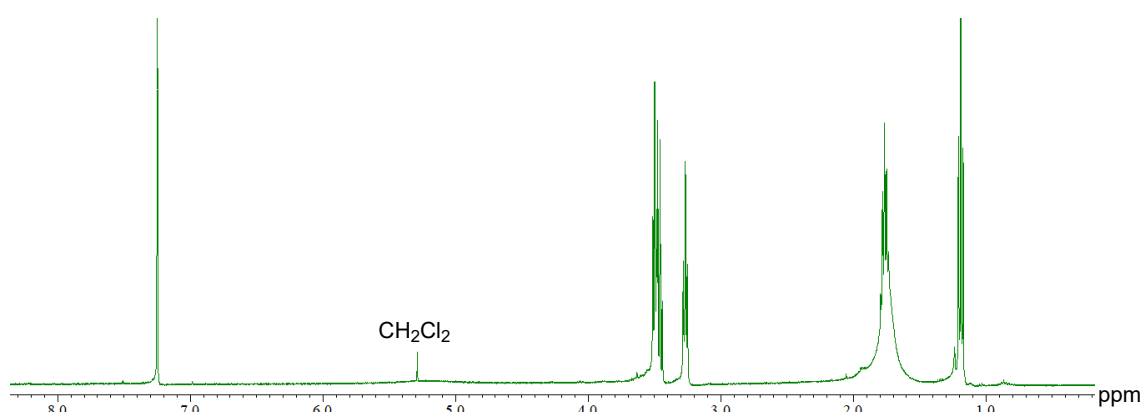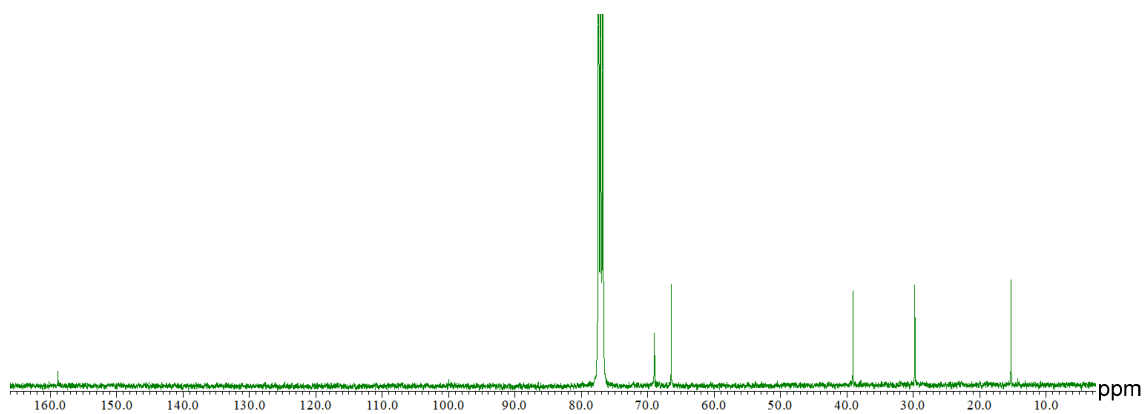

*N,N'*-Bis[(tetrahydrofuran-2-yl)methyl]urea (**2m**) [CAS Registry No. 875923-29-8]:  $^1\text{H}$  NMR (400 MHz,  $\text{CDCl}_3$ )  $\delta$  5.12 (br, 2H), 3.98-3.92 (m, 2H), 3.87-3.81 (m, 2H), 3.76-3.70 (m, 2H), 3.47-3.43 (m, 2H), 3.11-3.06 (m, 2H), 1.98-1.81 (m, 6H), 1.61-1.53 (m, 2H);  $^{13}\text{C}$  NMR (100 MHz,  $\text{CD}_3\text{CN}$ ) 159.5, 79.2, 68.5, 44.7, 29.2, 26.5 ppm; HRMS (ESI)  $m/z$  Calcd for  $\text{C}_{11}\text{H}_{20}\text{N}_2\text{O}_3\text{Na}$  ( $[\text{M} + \text{Na}]^+$ ), 251.1371; Found, 251.1376.

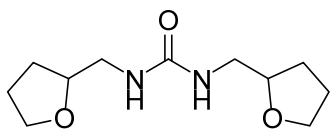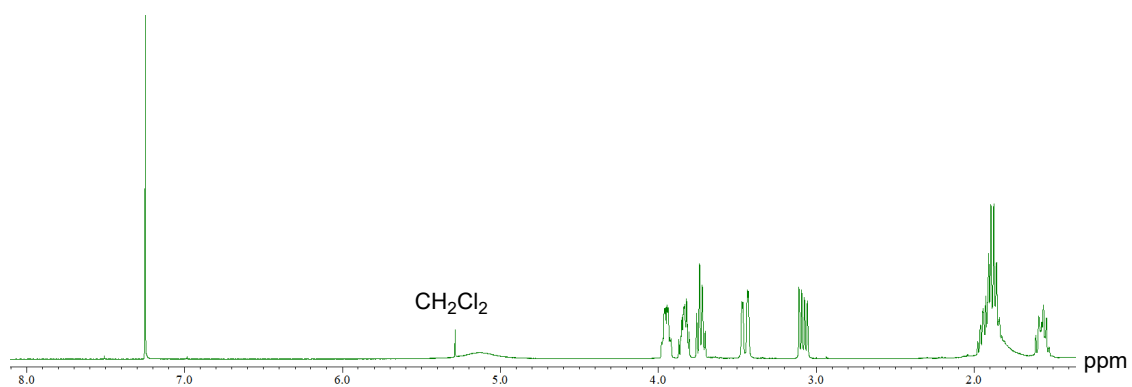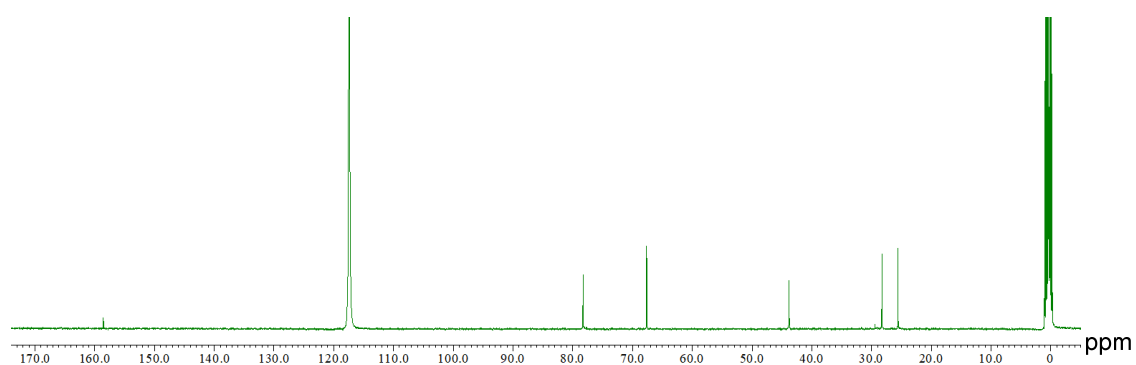

*N,N'*-Dicyclopentylurea (**2n**) [CAS Registry No. 58713-33-0]:  $^1\text{H}$  NMR (400 MHz,  $\text{CDCl}_3$ )  $\delta$  4.26 (br, 2H), 3.97-3.90 (m, 2H), 1.99-1.91 (m, 4H), 1.70-1.54 (m, 8H), 1.40-1.33 (m, 4H);  $^{13}\text{C}$  NMR (100 MHz,  $\text{CDCl}_3$ ) 157.9, 52.4, 33.8, 23.7 ppm; HRMS (ESI)  $m/z$  Calcd for  $\text{C}_{11}\text{H}_{20}\text{N}_2\text{ONa}$  ( $[\text{M} + \text{Na}]^+$ ), 219.1473; Found, 219.1461.

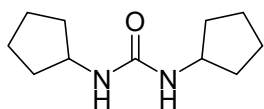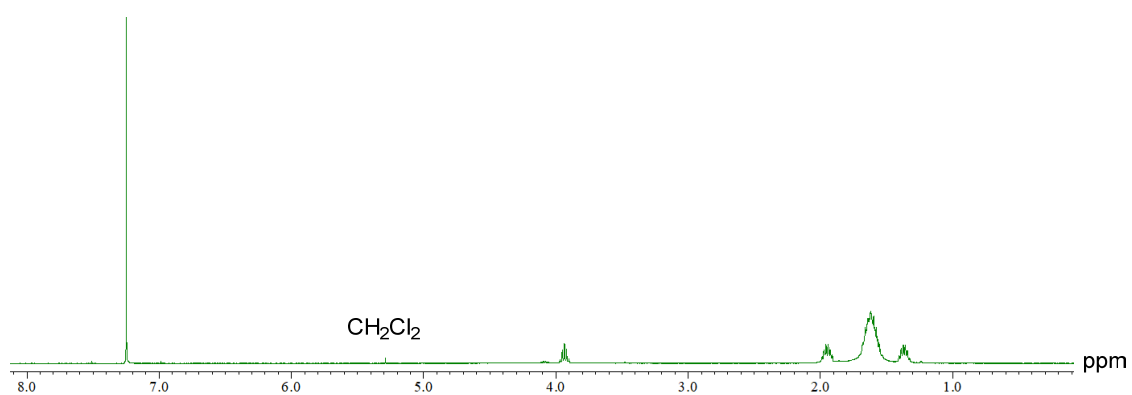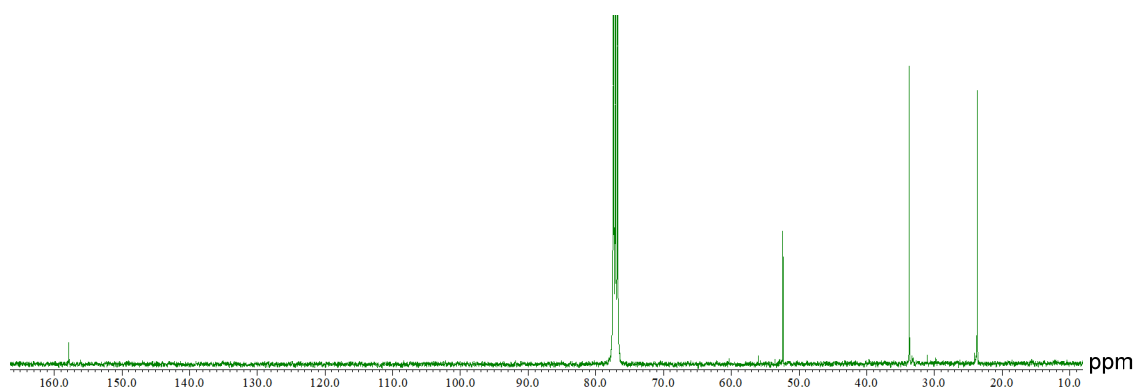

*N,N'*-Dicyclohexylurea (**2o**) [CAS Registry No. 2387-23-7]:  $^1\text{H}$  NMR (400 MHz,  $\text{CDCl}_3$ )  $\delta$  4.12 (br, 2H), 3.54-3.42 (m, 2H), 2.00-1.88 (m, 4H), 1.78-1.50 (m, 6H), 1.42-1.25 (m, 4H), 1.25-1.03 (m, 6H);  $^{13}\text{C}$  NMR (100 MHz,  $\text{CDCl}_3$ ) 156.9, 49.4, 34.1, 25.8, 25.1 ppm; HRMS (EI)  $m/z$  Calcd for  $\text{C}_{13}\text{H}_{24}\text{N}_2\text{O}$  ( $[\text{M}]^+$ ), 224.1889; Found, 224.1887.

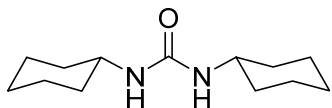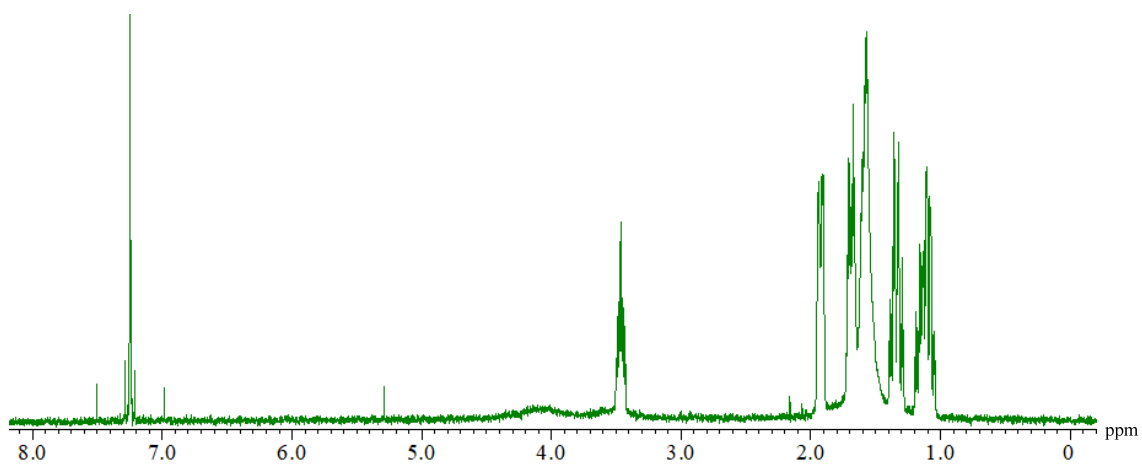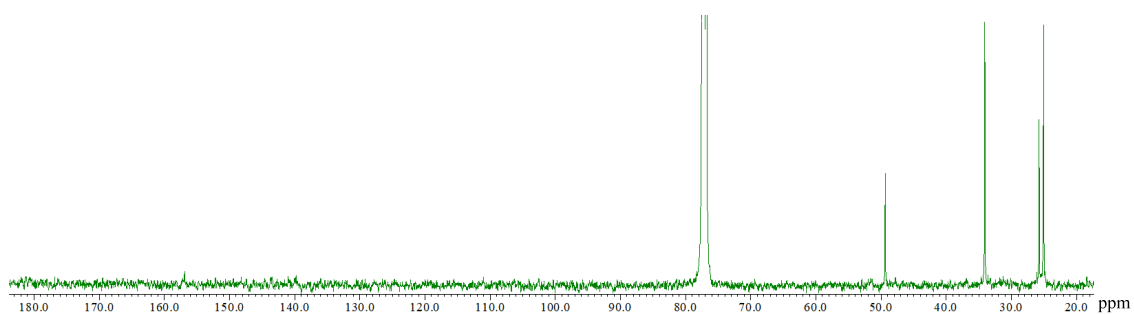

*N,N'*-Bis(tricyclo[3.3.1.1<sup>3,7</sup>]dec-1-yl)urea (**2p**) [CAS Registry No. 29559-44-2]: <sup>1</sup>H NMR (400 MHz, CDCl<sub>3</sub>) δ 3.82 (br, 2H), 2.05 (br, 6H), 1.96-1.92 (m, 12H), 1.68-1.63 (m, 12H); <sup>13</sup>C NMR (100 MHz, CDCl<sub>3</sub>) 156.3, 51.2, 42.7, 36.6, 29.7 ppm; HRMS (FAB) *m/z* Calcd for C<sub>21</sub>H<sub>33</sub>N<sub>2</sub>O ([M + H]<sup>+</sup>), 329.2587; Found, 329.2594.

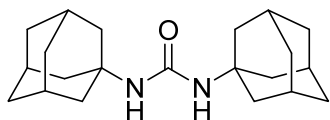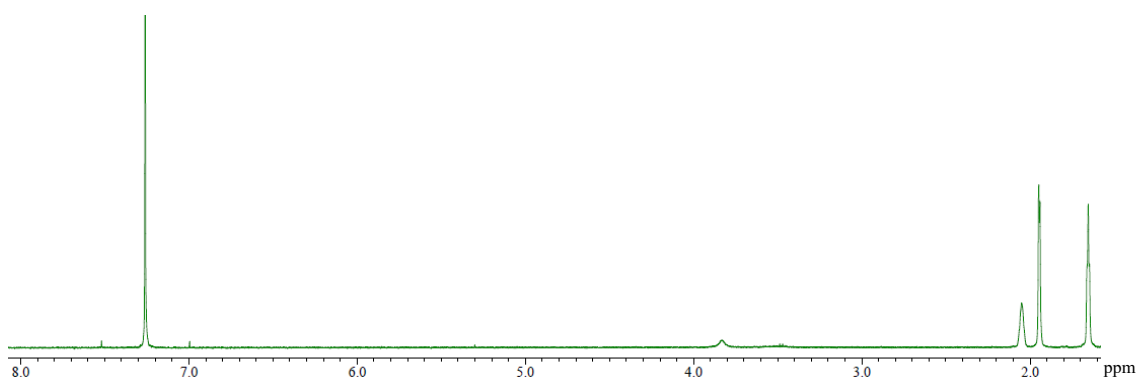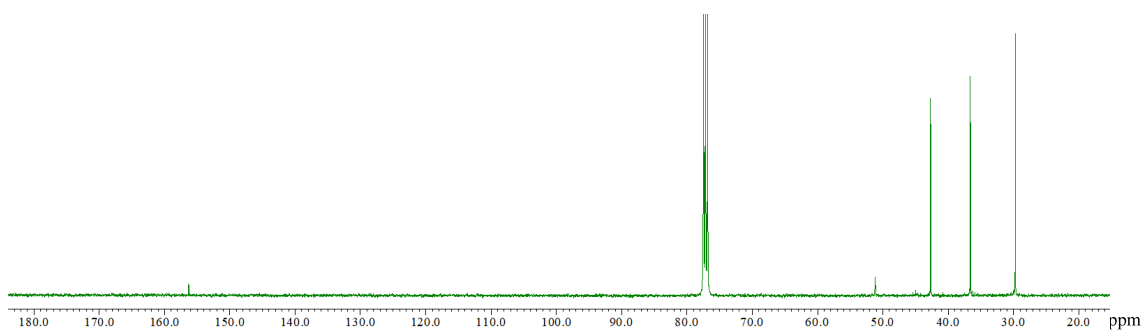

*N,N'*-Bis(4-methoxyphenyl)urea (**2q**) [CAS Registry No. 1227-44-7]:  $^1\text{H}$  NMR (400 MHz,  $\text{DMSO-}d_6$ )  $\delta$  8.34 (br, 2H), 7.33 (d,  $J = 9.2$  Hz, 4H), 6.85 (d,  $J = 9.2$  Hz, 4H), 3.71 (s, 6H);  $^{13}\text{C}$  NMR (100 MHz,  $\text{DMSO-}d_6$ ) 154.3, 152.9, 132.9, 119.9, 114.0, 55.2 ppm; HRMS (EI)  $m/z$  Calcd for  $\text{C}_{15}\text{H}_{16}\text{N}_2\text{O}_3$  ( $[\text{M}]^+$ ), 272.1161; Found, 272.1160.

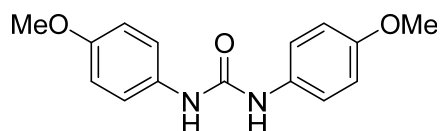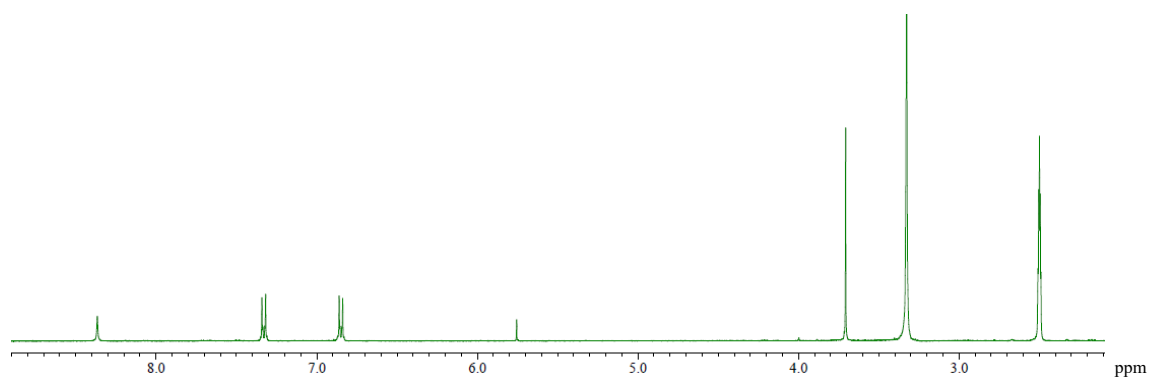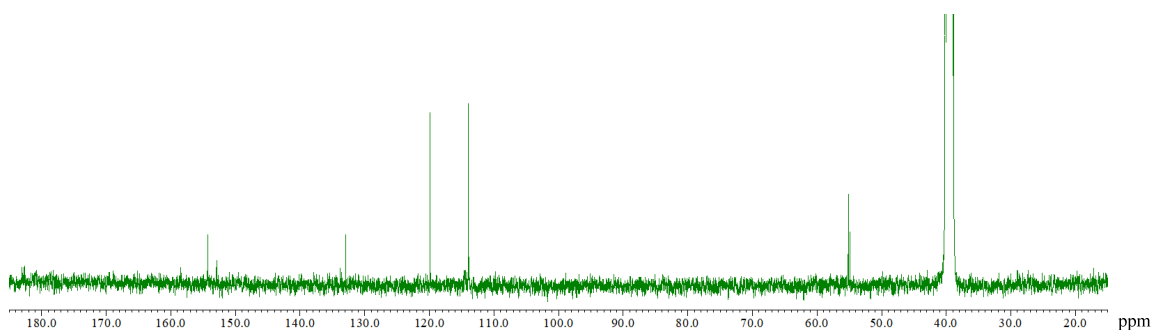

4-Phenyl-*N*-tricyclo[3.3.1.1<sup>3,7</sup>]dec-1-yl-1-piperazinecarboxamide (**2ps**) [CAS Registry No. 345973-04-8]: <sup>1</sup>H NMR (400 MHz, CDCl<sub>3</sub>) δ 7.28-7.30 (m, 2H), 6.87-6.94 (m, 3H), 4.24 (br 1H), 3.48 (t, *J* = 5.2 Hz, 4H), 3.18 (t, *J* = 5.2 Hz, 4H), 2.08 (br, 3H), 1.99-2.00 (m, 6H), 1.68 (br, 6H); <sup>13</sup>C NMR (100 MHz, CD<sub>3</sub>CN) 157.5, 152.5, 130.0, 120.5, 117.1, 51.8, 49.8, 44.7, 42.8, 37.2, 30.6 ppm; HRMS (ESI) *m/z* Calcd for C<sub>21</sub>H<sub>29</sub>N<sub>3</sub>ONa ([M + Na]<sup>+</sup>), 362.2208; Found, 362.2217.

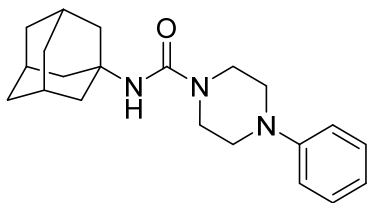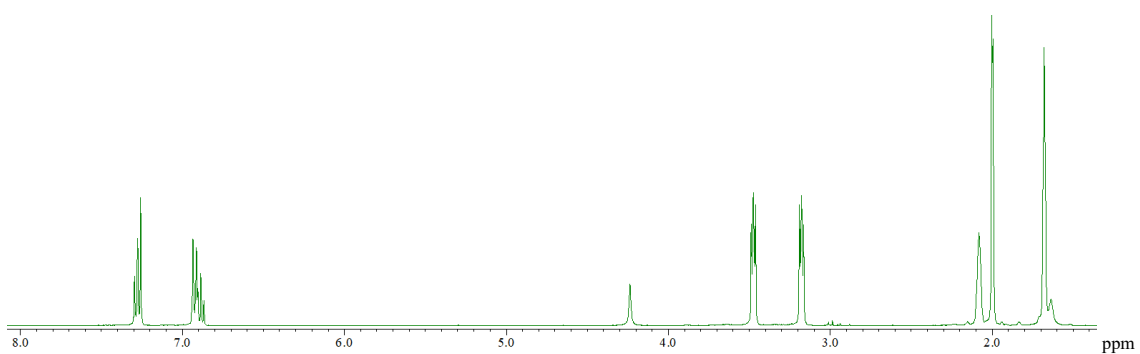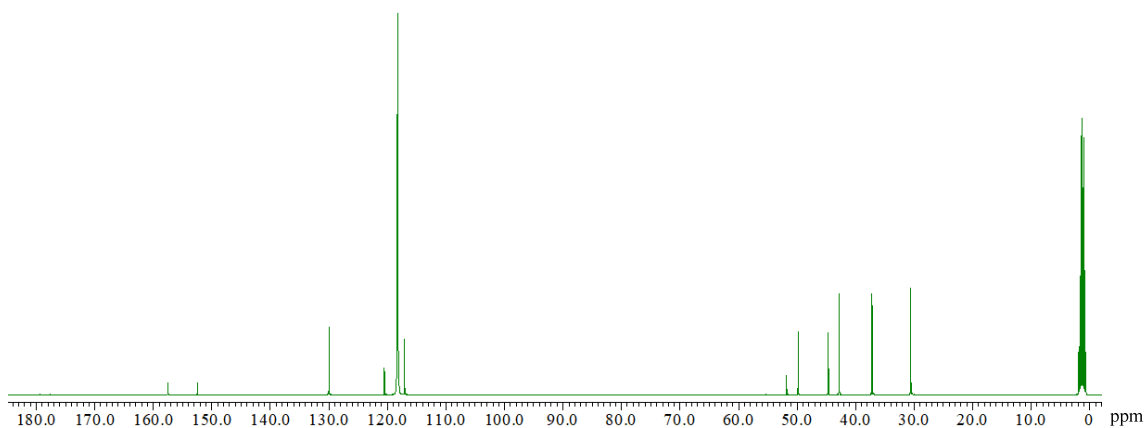

4-Phenyl-*N*-(2-phenylethyl)-1-piperidinecarboxamide (**2at**) [CAS Registry No. 1809527-27-2]:  $^1\text{H}$  NMR (400 MHz,  $\text{CDCl}_3$ )  $\delta$  7.33-7.18 (m, 10H), 4.49 (br, 1H), 4.02-3.98 (m 2H), 3.55-3.50 (m, 2H), 2.88-2.81 (m, 4H), 2.69-2.61 (m, 1H), 1.85-1.81 (m, 2H), 1.68-1.56 (m, 2H);  $^{13}\text{C}$  NMR (100 MHz,  $\text{CDCl}_3$ ) 157.5, 145.5, 139.5, 128.9, 128.6, 128.5, 126.7, 126.42, 126.36, 44.6, 42.7, 42.1, 36.4, 33.0 ppm; HRMS (EI)  $m/z$  Calcd for  $\text{C}_{20}\text{H}_{24}\text{N}_2\text{O}$  ( $[\text{M}]^+$ ), 308.1889; Found, 308.1887.

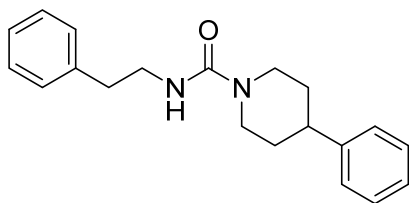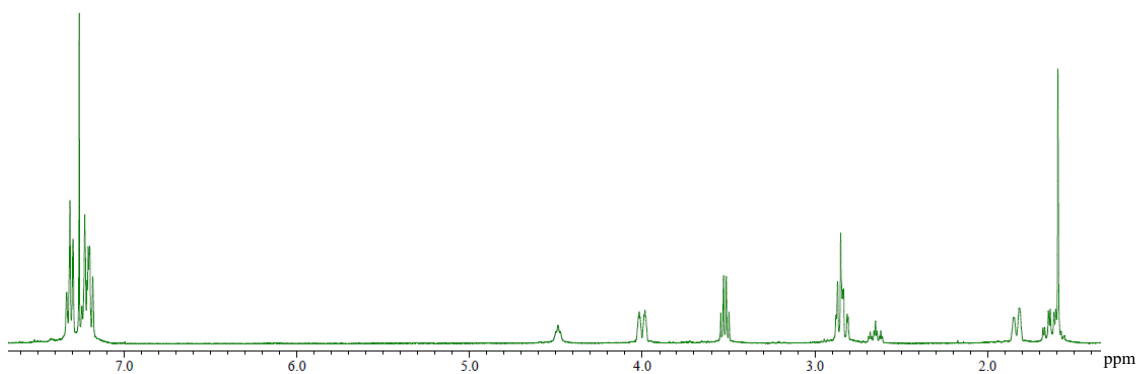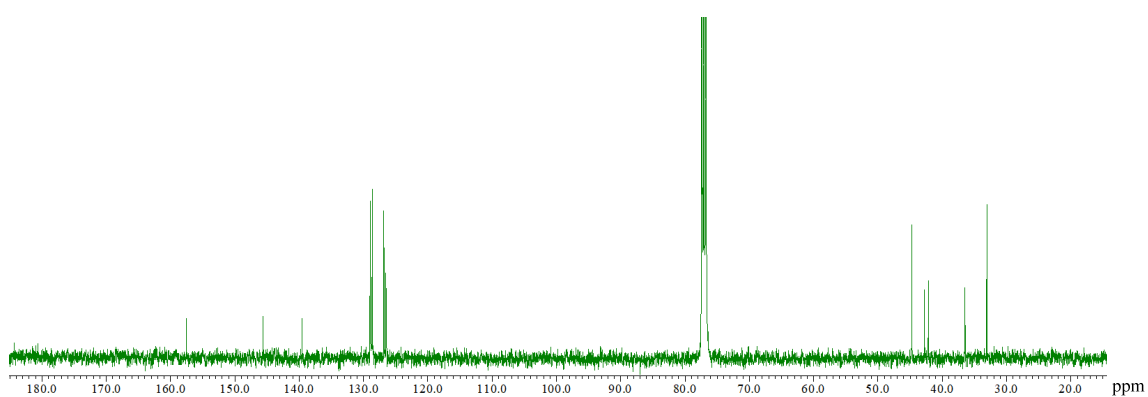



### The HPLC chart for *N,N'*-bis(1-phenylethyl)urea

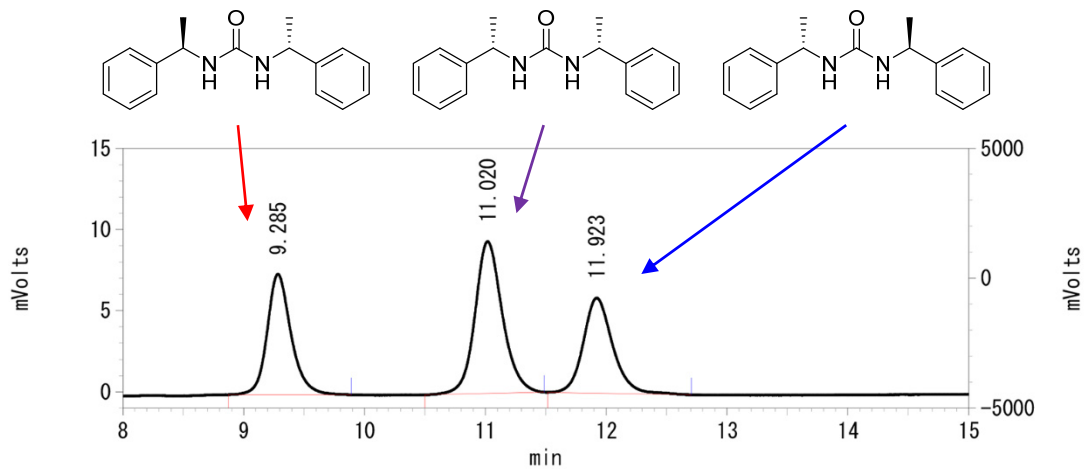

| Pk # | Retention Time | Area   | Area Percent |
|------|----------------|--------|--------------|
| 1    | 9.285          | 102434 | 29.318       |
| 2    | 11.020         | 147856 | 42.319       |
| 3    | 11.923         | 99095  | 28.363       |

### The HPLC chart for *N,N'*-bis[(1*S*)-1-phenylethyl]urea (2i)

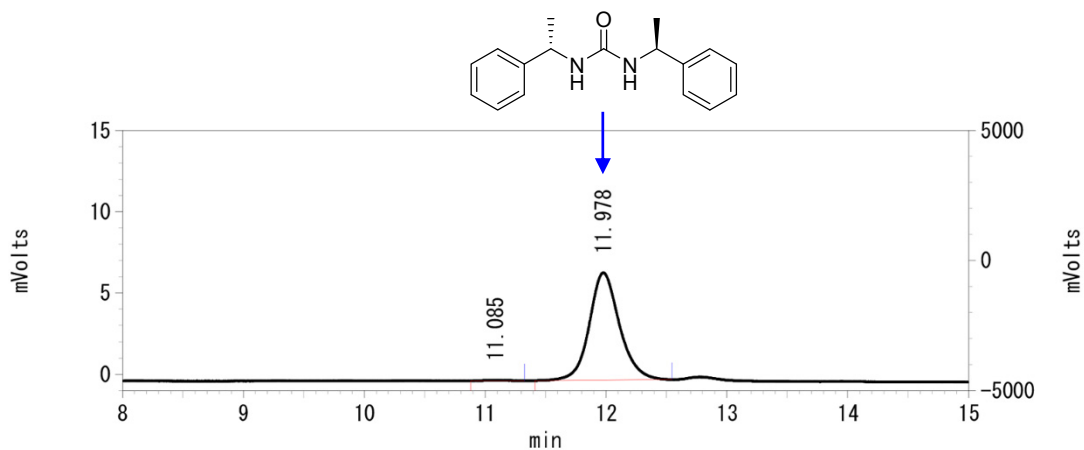

| Pk # | Retention Time | Area   | Area Percent |
|------|----------------|--------|--------------|
| 1    | 11.085         | 485    | 0.420        |
| 2    | 11.978         | 115106 | 99.580       |

## 10. References

- 1 D. C. Crans, H. Chen, O. P. Anderson and M. M. Miller, *J. Am. Chem. Soc.*, 1993, **115**, 6769-6776.
- 2 T. Moriuchi, M. Nishina and T. Hirao, *Angew. Chem. Int. Ed.*, 2010, **49**, 83-86.
